# Supplementary material for: Some dimension reduction strategies for the analysis of survey data
Source: Springer Nature journal article supplement (doi:10.1186/s40537-017-0103-6), 2017-12-01
Supplement: MOESM1 [file 15291306]

# Supplementary Material for Some Dimension Reduction Strategies for the Analysis of Survey Data

Jiaying Weng and Derek S. Young

Department of Statistics, University of Kentucky

October 29, 2017

## 1 Additional Tables and Figures

- Table 1 gives the variable numbers and definitions of variables used from the 2015 Planning Database.
- Tables 2 – 16 give the marginal tests for dimension using SIR, partial SIR, SAVE,  $y$ PHD, and  $r$ PHD, each for the responses  $Y_1$ ,  $Y_2$ , and  $Y_3$ .
- Table 17 gives the coefficients for the six largest principal components. Tables 18 – 20 give the coefficients of the directions using SIR for each of the responses  $Y_1$ ,  $Y_2$ , and  $Y_3$ .
- Figures 1 and 2 give the partial residual plots for the estimated additive models when  $Y_2$  is the response. Figures 3 and 4 give the partial residual plots for the estimated additive models when  $Y_3$  is the response.

| No. | Definitions                                                                                                                                                                                                                                         | Notation |
|-----|-----------------------------------------------------------------------------------------------------------------------------------------------------------------------------------------------------------------------------------------------------|----------|
| 73  | Number of people ages 25 years and over at the time of interview with a college degree or higher in the ACS population                                                                                                                              | $X_1$    |
| 77  | Number of people classified as below the poverty level given their total family income within the last year, family size, and family composition in the ACS population                                                                              | $X_2$    |
| 103 | Number of ACS households in which the householder and his or her spouse are listed as members of the same household; does not include same-sex married couples                                                                                      | $X_3$    |
| 112 | Number of ACS households where a householder lives alone or with nonrelatives only; includes same-sex couples where no relatives of the householder are present                                                                                     | $X_4$    |
| 115 | Number of ACS households where a householder lives alone                                                                                                                                                                                            | $X_5$    |
| 124 | Number of ACS families with related children under 6 years old                                                                                                                                                                                      | $X_6$    |
| 130 | Median ACS household income for the block group                                                                                                                                                                                                     | $X_7$    |
| 132 | Median ACS household income for the tract                                                                                                                                                                                                           | $X_8$    |
| 145 | Number of 2010 Census occupied housing units that are not owner occupied, whether they are rented or occupied without payment of rent                                                                                                               | $X_9$    |
| 149 | Number of ACS housing units where owner or co-owner lives in it                                                                                                                                                                                     | $X_{10}$ |
| 151 | Number of ACS housing units in which the structure contains only that single unit                                                                                                                                                                   | $X_{11}$ |
| 153 | Number of ACS housing units in which the structure contains 2 or more housing units                                                                                                                                                                 | $X_{12}$ |
| 155 | Number of ACS housing units in which the structure contains 10 or more housing units                                                                                                                                                                | $X_{13}$ |
| 167 | Median of ACS respondents' house value estimates for the block group                                                                                                                                                                                | $X_{14}$ |
| 169 | Median of ACS respondents' house value estimates for the tract                                                                                                                                                                                      | $X_{15}$ |
| 3   | Name of State or statistically equivalent territory; island territories are excluded from this analysis; these values are converted to a categorical variable based on 9 Census-designated geographical regions; only used for partial SIR analysis | $W$      |
| 83  | Number of people with no health insurance coverage in the ACS                                                                                                                                                                                       | $Y_1$    |
| 79  | Number of people with one type of health insurance coverage in the ACS                                                                                                                                                                              | $Y_2$    |
| 81  | Number of people with two or more types of health insurance coverage in the ACS                                                                                                                                                                     | $Y_3$    |

Table 1: The first two columns are the variable numbers and definitions as given in the 2015 Planning Database documentation. The last column is the variable notation used in our manuscript.

|                 | Stat        | df        | p.value |
|-----------------|-------------|-----------|---------|
| 0D vs $\geq$ 1D | 127778.6966 | 1350.0000 | 0.0000  |
| 1D vs $\geq$ 2D | 16024.8353  | 1246.0000 | 0.0000  |
| 2D vs $\geq$ 3D | 3047.0326   | 1144.0000 | 0.0000  |
| 3D vs $\geq$ 4D | 1734.3518   | 1044.0000 | 0.0000  |
| 4D vs $\geq$ 5D | 1066.5385   | 946.0000  | 0.0037  |
| 5D vs $\geq$ 6D | 887.9807    | 850.0000  | 0.1778  |

Table 2: Marginal tests for dimension using SIR for  $Y_1$ .

|                 | Stat        | df        | p.value |
|-----------------|-------------|-----------|---------|
| 0D vs $\geq$ 1D | 190395.5193 | 1440.0000 | 0.0000  |
| 1D vs $\geq$ 2D | 14939.5602  | 1330.0000 | 0.0000  |
| 2D vs $\geq$ 3D | 3219.2447   | 1222.0000 | 0.0000  |
| 3D vs $\geq$ 4D | 2105.2266   | 1116.0000 | 0.0000  |
| 4D vs $\geq$ 5D | 1446.9417   | 1012.0000 | 0.0000  |
| 5D vs $\geq$ 6D | 985.2887    | 910.0000  | 0.0415  |
| 6D vs $\geq$ 7D | 819.7028    | 810.0000  | 0.3987  |

Table 3: Marginal tests for dimension using SIR for  $Y_2$ .

|                 | Stat        | df        | p.value |
|-----------------|-------------|-----------|---------|
| 0D vs $\geq$ 1D | 122357.2786 | 1350.0000 | 0.0000  |
| 1D vs $\geq$ 2D | 4365.2667   | 1246.0000 | 0.0000  |
| 2D vs $\geq$ 3D | 1652.9354   | 1144.0000 | 0.0000  |
| 3D vs $\geq$ 4D | 1090.7890   | 1044.0000 | 0.1530  |

Table 4: Marginal tests for dimension using SIR for  $Y_3$ .

|                   | Stat        | df        | p.value |
|-------------------|-------------|-----------|---------|
| 0D vs $\geq$ 1D   | 135883.3292 | 1890.0000 | 0.0000  |
| 1D vs $\geq$ 2D   | 30601.3194  | 1750.0000 | 0.0000  |
| 2D vs $\geq$ 3D   | 17235.6722  | 1612.0000 | 0.0000  |
| 3D vs $\geq$ 4D   | 11202.4369  | 1476.0000 | 0.0000  |
| 4D vs $\geq$ 5D   | 5729.4764   | 1342.0000 | 0.0000  |
| 5D vs $\geq$ 6D   | 4036.6166   | 1210.0000 | 0.0000  |
| 6D vs $\geq$ 7D   | 3074.6650   | 1080.0000 | 0.0000  |
| 7D vs $\geq$ 8D   | 2225.1084   | 952.0000  | 0.0000  |
| 8D vs $\geq$ 9D   | 1611.4217   | 826.0000  | 0.0000  |
| 9D vs $\geq$ 10D  | 1143.4266   | 702.0000  | 0.0000  |
| 10D vs $\geq$ 11D | 838.7606    | 580.0000  | 0.0000  |
| 11D vs $\geq$ 12D | 564.9019    | 460.0000  | 0.0006  |
| 12D vs $\geq$ 13D | 378.5320    | 342.0000  | 0.0845  |

Table 5: Marginal tests for dimension using partial SIR for  $Y_1$ .

|                   | Stat        | df        | p.value |
|-------------------|-------------|-----------|---------|
| 0D vs $\geq$ 1D   | 186797.3133 | 1890.0000 | 0.0000  |
| 1D vs $\geq$ 2D   | 19837.5882  | 1750.0000 | 0.0000  |
| 2D vs $\geq$ 3D   | 11290.3427  | 1612.0000 | 0.0000  |
| 3D vs $\geq$ 4D   | 6349.3462   | 1476.0000 | 0.0000  |
| 4D vs $\geq$ 5D   | 4578.4808   | 1342.0000 | 0.0000  |
| 5D vs $\geq$ 6D   | 3574.0556   | 1210.0000 | 0.0000  |
| 6D vs $\geq$ 7D   | 2712.0028   | 1080.0000 | 0.0000  |
| 7D vs $\geq$ 8D   | 2101.2728   | 952.0000  | 0.0000  |
| 8D vs $\geq$ 9D   | 1544.1730   | 826.0000  | 0.0000  |
| 9D vs $\geq$ 10D  | 1090.4002   | 702.0000  | 0.0000  |
| 10D vs $\geq$ 11D | 713.0341    | 580.0000  | 0.0001  |
| 11D vs $\geq$ 12D | 520.1782    | 460.0000  | 0.0271  |
| 12D vs $\geq$ 13D | 354.5500    | 342.0000  | 0.3087  |

Table 6: Marginal tests for dimension using partial SIR for  $Y_2$ .

|                   | Stat        | df        | p.value |
|-------------------|-------------|-----------|---------|
| 0D vs $\geq$ 1D   | 125037.5661 | 1890.0000 | 0.0000  |
| 1D vs $\geq$ 2D   | 12174.7443  | 1750.0000 | 0.0000  |
| 2D vs $\geq$ 3D   | 7708.3127   | 1612.0000 | 0.0000  |
| 3D vs $\geq$ 4D   | 5508.1238   | 1476.0000 | 0.0000  |
| 4D vs $\geq$ 5D   | 3601.2730   | 1342.0000 | 0.0000  |
| 5D vs $\geq$ 6D   | 2592.4299   | 1210.0000 | 0.0000  |
| 6D vs $\geq$ 7D   | 2036.2467   | 1080.0000 | 0.0000  |
| 7D vs $\geq$ 8D   | 1586.4564   | 952.0000  | 0.0000  |
| 8D vs $\geq$ 9D   | 1169.7110   | 826.0000  | 0.0000  |
| 9D vs $\geq$ 10D  | 883.9065    | 702.0000  | 0.0000  |
| 10D vs $\geq$ 11D | 662.7294    | 580.0000  | 0.0096  |
| 11D vs $\geq$ 12D | 503.9640    | 460.0000  | 0.0767  |

Table 7: Marginal tests for dimension using partial SIR for  $Y_3$ .

|                   | Stat        | df(Nor)    | p.value(Nor) | p.value(Gen) |
|-------------------|-------------|------------|--------------|--------------|
| 0D vs $\geq$ 1D   | 155893.0352 | 10800.0000 | 0.0000       | 0.0000       |
| 1D vs $\geq$ 2D   | 100362.0724 | 9450.0000  | 0.0000       | 0.0000       |
| 2D vs $\geq$ 3D   | 67439.6073  | 8190.0000  | 0.0000       | 0.0000       |
| 3D vs $\geq$ 4D   | 51215.0052  | 7020.0000  | 0.0000       | 0.0000       |
| 4D vs $\geq$ 5D   | 35688.0690  | 5940.0000  | 0.0000       | 0.0000       |
| 5D vs $\geq$ 6D   | 26905.6040  | 4950.0000  | 0.0000       | 0.0000       |
| 6D vs $\geq$ 7D   | 19995.1203  | 4050.0000  | 0.0000       | 0.0000       |
| 7D vs $\geq$ 8D   | 14602.3232  | 3240.0000  | 0.0000       | 0.0000       |
| 8D vs $\geq$ 9D   | 9537.5269   | 2520.0000  | 0.0000       | 0.0000       |
| 9D vs $\geq$ 10D  | 6363.6019   | 1890.0000  | 0.0000       | 0.0000       |
| 10D vs $\geq$ 11D | 4106.7176   | 1350.0000  | 0.0000       | 0.0000       |
| 11D vs $\geq$ 12D | 2501.2630   | 900.0000   | 0.0000       | 0.0000       |
| 12D vs $\geq$ 13D | 963.0952    | 540.0000   | 0.0000       | 0.0000       |
| 13D vs $\geq$ 14D | 481.3117    | 270.0000   | 0.0000       | 0.0000       |
| 14D vs $\geq$ 15D | 165.6979    | 90.0000    | 0.0000       | 0.0001       |

Table 8: Marginal tests for dimension using SAVE for  $Y_1$ .

|                   | Stat        | df(Nor)    | p.value(Nor) | p.value(Gen) |
|-------------------|-------------|------------|--------------|--------------|
| 0D vs $\geq$ 1D   | 202380.8499 | 11520.0000 | 0.0000       | 0.0000       |
| 1D vs $\geq$ 2D   | 120104.8546 | 10080.0000 | 0.0000       | 0.0000       |
| 2D vs $\geq$ 3D   | 86294.5554  | 8736.0000  | 0.0000       | 0.0000       |
| 3D vs $\geq$ 4D   | 67227.5472  | 7488.0000  | 0.0000       | 0.0000       |
| 4D vs $\geq$ 5D   | 50647.6075  | 6336.0000  | 0.0000       | 0.0000       |
| 5D vs $\geq$ 6D   | 38796.3954  | 5280.0000  | 0.0000       | 0.0000       |
| 6D vs $\geq$ 7D   | 29546.9660  | 4320.0000  | 0.0000       | 0.0000       |
| 7D vs $\geq$ 8D   | 20973.2996  | 3456.0000  | 0.0000       | 0.0000       |
| 8D vs $\geq$ 9D   | 13229.5670  | 2688.0000  | 0.0000       | 0.0000       |
| 9D vs $\geq$ 10D  | 8881.6138   | 2016.0000  | 0.0000       | 0.0000       |
| 10D vs $\geq$ 11D | 5079.2924   | 1440.0000  | 0.0000       | 0.0000       |
| 11D vs $\geq$ 12D | 2796.0802   | 960.0000   | 0.0000       | 0.0000       |
| 12D vs $\geq$ 13D | 1608.2308   | 576.0000   | 0.0000       | 0.0000       |
| 13D vs $\geq$ 14D | 920.0632    | 288.0000   | 0.0000       | 0.0000       |
| 14D vs $\geq$ 15D | 130.5440    | 96.0000    | 0.0110       | 0.2348       |

Table 9: Marginal tests for dimension using SAVE for  $Y_2$ .

|                   | Stat        | df(Nor)    | p.value(Nor) | p.value(Gen) |
|-------------------|-------------|------------|--------------|--------------|
| 0D vs $\geq$ 1D   | 165243.9364 | 10800.0000 | 0.0000       | 0.0000       |
| 1D vs $\geq$ 2D   | 93909.3811  | 9450.0000  | 0.0000       | 0.0000       |
| 2D vs $\geq$ 3D   | 72197.5033  | 8190.0000  | 0.0000       | 0.0000       |
| 3D vs $\geq$ 4D   | 53503.1774  | 7020.0000  | 0.0000       | 0.0000       |
| 4D vs $\geq$ 5D   | 36097.7707  | 5940.0000  | 0.0000       | 0.0000       |
| 5D vs $\geq$ 6D   | 30187.7898  | 4950.0000  | 0.0000       | 0.0000       |
| 6D vs $\geq$ 7D   | 21426.5150  | 4050.0000  | 0.0000       | 0.0000       |
| 7D vs $\geq$ 8D   | 14761.7767  | 3240.0000  | 0.0000       | 0.0000       |
| 8D vs $\geq$ 9D   | 11924.8792  | 2520.0000  | 0.0000       | 0.0000       |
| 9D vs $\geq$ 10D  | 8029.3853   | 1890.0000  | 0.0000       | 0.0000       |
| 10D vs $\geq$ 11D | 4863.7098   | 1350.0000  | 0.0000       | 0.0000       |
| 11D vs $\geq$ 12D | 2440.2639   | 900.0000   | 0.0000       | 0.0000       |
| 12D vs $\geq$ 13D | 1374.6700   | 540.0000   | 0.0000       | 0.0000       |
| 13D vs $\geq$ 14D | 660.7789    | 270.0000   | 0.0000       | 0.0000       |
| 14D vs $\geq$ 15D | 263.5019    | 90.0000    | 0.0000       | 0.0000       |

Table 10: Marginal tests for dimension using SAVE for  $Y_3$ .

|                   | Stat        | df       | p.value |
|-------------------|-------------|----------|---------|
| 0D vs $\geq$ 1D   | 177617.1046 | 120.0000 | 0.0000  |
| 1D vs $\geq$ 2D   | 88173.7126  | 105.0000 | 0.0000  |
| 2D vs $\geq$ 3D   | 45843.1292  | 91.0000  | 0.0000  |
| 3D vs $\geq$ 4D   | 29122.7571  | 78.0000  | 0.0000  |
| 4D vs $\geq$ 5D   | 19138.0857  | 66.0000  | 0.0000  |
| 5D vs $\geq$ 6D   | 13805.7601  | 55.0000  | 0.0000  |
| 6D vs $\geq$ 7D   | 9985.1348   | 45.0000  | 0.0000  |
| 7D vs $\geq$ 8D   | 6520.6016   | 36.0000  | 0.0000  |
| 8D vs $\geq$ 9D   | 3889.2340   | 28.0000  | 0.0000  |
| 9D vs $\geq$ 10D  | 1590.2069   | 21.0000  | 0.0000  |
| 10D vs $\geq$ 11D | 942.9892    | 15.0000  | 0.0000  |
| 11D vs $\geq$ 12D | 486.7179    | 10.0000  | 0.0000  |
| 12D vs $\geq$ 13D | 71.1956     | 6.0000   | 0.0000  |
| 13D vs $\geq$ 14D | 12.2295     | 3.0000   | 0.0066  |
| 14D vs $\geq$ 15D | 1.0953      | 1.0000   | 0.2953  |

Table 11: Marginal tests for dimension using  $y$ PHD for  $Y_1$ .

|                   | Stat        | df       | p.value |
|-------------------|-------------|----------|---------|
| 0D vs $\geq$ 1D   | 439738.0094 | 120.0000 | 0.0000  |
| 1D vs $\geq$ 2D   | 76715.4122  | 105.0000 | 0.0000  |
| 2D vs $\geq$ 3D   | 51136.6858  | 91.0000  | 0.0000  |
| 3D vs $\geq$ 4D   | 38958.6704  | 78.0000  | 0.0000  |
| 4D vs $\geq$ 5D   | 29988.2428  | 66.0000  | 0.0000  |
| 5D vs $\geq$ 6D   | 22442.1725  | 55.0000  | 0.0000  |
| 6D vs $\geq$ 7D   | 16056.8839  | 45.0000  | 0.0000  |
| 7D vs $\geq$ 8D   | 10865.5818  | 36.0000  | 0.0000  |
| 8D vs $\geq$ 9D   | 7673.7579   | 28.0000  | 0.0000  |
| 9D vs $\geq$ 10D  | 5090.7992   | 21.0000  | 0.0000  |
| 10D vs $\geq$ 11D | 3086.2911   | 15.0000  | 0.0000  |
| 11D vs $\geq$ 12D | 1695.3168   | 10.0000  | 0.0000  |
| 12D vs $\geq$ 13D | 799.5905    | 6.0000   | 0.0000  |
| 13D vs $\geq$ 14D | 157.2727    | 3.0000   | 0.0000  |
| 14D vs $\geq$ 15D | 49.1525     | 1.0000   | 0.0000  |

Table 12: Marginal tests for dimension using  $y$ PHD for  $Y_2$ .

|                   | Stat        | df       | p.value |
|-------------------|-------------|----------|---------|
| 0D vs $\geq$ 1D   | 353756.5493 | 120.0000 | 0.0000  |
| 1D vs $\geq$ 2D   | 66815.8666  | 105.0000 | 0.0000  |
| 2D vs $\geq$ 3D   | 42564.1906  | 91.0000  | 0.0000  |
| 3D vs $\geq$ 4D   | 29255.1540  | 78.0000  | 0.0000  |
| 4D vs $\geq$ 5D   | 21253.0088  | 66.0000  | 0.0000  |
| 5D vs $\geq$ 6D   | 15753.9311  | 55.0000  | 0.0000  |
| 6D vs $\geq$ 7D   | 11745.6460  | 45.0000  | 0.0000  |
| 7D vs $\geq$ 8D   | 7916.3094   | 36.0000  | 0.0000  |
| 8D vs $\geq$ 9D   | 5256.1625   | 28.0000  | 0.0000  |
| 9D vs $\geq$ 10D  | 3157.9192   | 21.0000  | 0.0000  |
| 10D vs $\geq$ 11D | 1365.1721   | 15.0000  | 0.0000  |
| 11D vs $\geq$ 12D | 377.5952    | 10.0000  | 0.0000  |
| 12D vs $\geq$ 13D | 161.2063    | 6.0000   | 0.0000  |
| 13D vs $\geq$ 14D | 23.7377     | 3.0000   | 0.0000  |
| 14D vs $\geq$ 15D | 2.0988      | 1.0000   | 0.1474  |

Table 13: Marginal tests for dimension using  $y$ PHD for  $Y_3$ .

|                   | Stat       | df       | Normal theory | General theory |
|-------------------|------------|----------|---------------|----------------|
| 0D vs $\geq$ 1D   | 63493.5068 | 120.0000 | 0.0000        | 0.0000         |
| 1D vs $\geq$ 2D   | 21521.6466 | 105.0000 | 0.0000        | 0.0000         |
| 2D vs $\geq$ 3D   | 14422.7581 | 91.0000  | 0.0000        | 0.0000         |
| 3D vs $\geq$ 4D   | 10123.7357 | 78.0000  | 0.0000        | 0.0000         |
| 4D vs $\geq$ 5D   | 7327.0031  | 66.0000  | 0.0000        | 0.0000         |
| 5D vs $\geq$ 6D   | 5386.9316  | 55.0000  | 0.0000        | 0.0000         |
| 6D vs $\geq$ 7D   | 3747.6975  | 45.0000  | 0.0000        | 0.0000         |
| 7D vs $\geq$ 8D   | 2532.2495  | 36.0000  | 0.0000        | 0.0000         |
| 8D vs $\geq$ 9D   | 1508.2198  | 28.0000  | 0.0000        | 0.0000         |
| 9D vs $\geq$ 10D  | 894.7523   | 21.0000  | 0.0000        | 0.0000         |
| 10D vs $\geq$ 11D | 466.2296   | 15.0000  | 0.0000        | 0.0046         |
| 11D vs $\geq$ 12D | 245.7336   | 10.0000  | 0.0000        | 0.0261         |
| 12D vs $\geq$ 13D | 113.4531   | 6.0000   | 0.0000        | 0.1162         |

Table 14: Marginal tests for dimension using  $r$ PHD for  $Y_1$ .



|                   | Stat        | df       | Normal theory | General theory |
|-------------------|-------------|----------|---------------|----------------|
| 0D vs $\geq$ 1D   | 297042.0875 | 120.0000 | 0.0000        | 0.0000         |
| 1D vs $\geq$ 2D   | 57454.3761  | 105.0000 | 0.0000        | 0.0000         |
| 2D vs $\geq$ 3D   | 32396.9258  | 91.0000  | 0.0000        | 0.0000         |
| 3D vs $\geq$ 4D   | 21121.3081  | 78.0000  | 0.0000        | 0.0000         |
| 4D vs $\geq$ 5D   | 15731.3264  | 66.0000  | 0.0000        | 0.0000         |
| 5D vs $\geq$ 6D   | 11043.5915  | 55.0000  | 0.0000        | 0.0000         |
| 6D vs $\geq$ 7D   | 8151.5707   | 45.0000  | 0.0000        | 0.0000         |
| 7D vs $\geq$ 8D   | 6093.5342   | 36.0000  | 0.0000        | 0.0000         |
| 8D vs $\geq$ 9D   | 4369.9673   | 28.0000  | 0.0000        | 0.0000         |
| 9D vs $\geq$ 10D  | 3045.2298   | 21.0000  | 0.0000        | 0.0000         |
| 10D vs $\geq$ 11D | 1774.6722   | 15.0000  | 0.0000        | 0.0000         |
| 11D vs $\geq$ 12D | 981.6630    | 10.0000  | 0.0000        | 0.0000         |
| 12D vs $\geq$ 13D | 448.7045    | 6.0000   | 0.0000        | 0.0000         |
| 13D vs $\geq$ 14D | 202.5587    | 3.0000   | 0.0000        | 0.0000         |
| 14D vs $\geq$ 15D | 32.6826     | 1.0000   | 0.0000        | 0.0000         |

Table 15: Marginal tests for dimension using  $r$ PHD for  $Y_2$ .

|                   | Stat        | df       | Normal theory | General theory |
|-------------------|-------------|----------|---------------|----------------|
| 0D vs $\geq$ 1D   | 186134.5644 | 120.0000 | 0.0000        | 0.0791         |
| 1D vs $\geq$ 2D   | 21586.0017  | 105.0000 | 0.0000        | 0.0000         |
| 2D vs $\geq$ 3D   | 12164.9782  | 91.0000  | 0.0000        | 0.0000         |
| 3D vs $\geq$ 4D   | 7662.8802   | 78.0000  | 0.0000        | 0.0000         |
| 4D vs $\geq$ 5D   | 5390.0871   | 66.0000  | 0.0000        | 0.0000         |
| 5D vs $\geq$ 6D   | 3877.5847   | 55.0000  | 0.0000        | 0.0000         |
| 6D vs $\geq$ 7D   | 2616.0759   | 45.0000  | 0.0000        | 0.0000         |
| 7D vs $\geq$ 8D   | 1464.6075   | 36.0000  | 0.0000        | 0.0000         |
| 8D vs $\geq$ 9D   | 723.0290    | 28.0000  | 0.0000        | 0.0000         |
| 9D vs $\geq$ 10D  | 283.0354    | 21.0000  | 0.0000        | 0.0000         |
| 10D vs $\geq$ 11D | 124.2678    | 15.0000  | 0.0000        | 0.0000         |
| 11D vs $\geq$ 12D | 64.9884     | 10.0000  | 0.0000        | 0.0001         |
| 12D vs $\geq$ 13D | 31.5987     | 6.0000   | 0.0000        | 0.0153         |
| 13D vs $\geq$ 14D | 12.3845     | 3.0000   | 0.0062        | 0.0721         |
| 14D vs $\geq$ 15D | 1.7082      | 1.0000   | 0.1912        | 0.3870         |

Table 16: Marginal tests for dimension using  $r$ PHD for  $Y_3$ .

|          | PC1     | PC2     | PC3     | PC4     | PC5     | PC6     |
|----------|---------|---------|---------|---------|---------|---------|
| $X_1$    | 0.3525  | -0.2220 | -0.0804 | 0.0792  | -0.0381 | 0.0175  |
| $X_2$    | -0.2199 | -0.2521 | 0.1719  | -0.4050 | 0.5662  | 0.0452  |
| $X_3$    | 0.3206  | -0.1968 | 0.2861  | -0.1045 | -0.0947 | 0.0107  |
| $X_4$    | -0.0243 | -0.4363 | -0.0496 | 0.3840  | 0.1575  | 0.0010  |
| $X_5$    | -0.0285 | -0.4231 | -0.0289 | 0.4330  | 0.1240  | 0.0186  |
| $X_6$    | 0.0926  | -0.2500 | 0.2436  | -0.5910 | -0.2395 | 0.1838  |
| $X_7$    | 0.3995  | 0.0907  | -0.1207 | -0.0124 | -0.2023 | 0.0353  |
| $X_8$    | 0.3909  | 0.0485  | -0.1644 | -0.0141 | -0.0959 | 0.0623  |
| $X_9$    | -0.1554 | -0.4076 | -0.1521 | -0.1533 | 0.0054  | 0.0266  |
| $X_{10}$ | 0.3047  | -0.1725 | 0.3625  | 0.1379  | -0.0128 | -0.0539 |
| $X_{11}$ | 0.2492  | -0.1457 | 0.4150  | 0.0522  | 0.0625  | -0.2072 |
| $X_{12}$ | -0.1501 | -0.2912 | -0.2521 | -0.1776 | -0.3920 | -0.7522 |
| $X_{13}$ | -0.0893 | -0.3204 | -0.2985 | -0.0264 | -0.3511 | 0.5796  |
| $X_{14}$ | 0.3141  | -0.0186 | -0.3770 | -0.1696 | 0.3445  | -0.0818 |
| $X_{15}$ | 0.3065  | -0.0320 | -0.3955 | -0.1672 | 0.3487  | -0.0581 |

Table 17: Coefficients for the six largest principal components.

|          | Dir1    | Dir2    | Dir3    | Dir4    | Dir5    |
|----------|---------|---------|---------|---------|---------|
| $X_1$    | 0.2073  | 0.1264  | 0.1019  | 0.1734  | 0.0052  |
| $X_2$    | -0.3213 | -0.2656 | -0.1104 | -0.0487 | 0.2663  |
| $X_3$    | -0.0989 | -0.1650 | 0.1767  | -0.1665 | -0.0581 |
| $X_4$    | -0.1878 | 0.2178  | 0.1142  | -0.0637 | -0.4361 |
| $X_5$    | 0.3161  | -0.2274 | -0.1972 | 0.0662  | 0.2631  |
| $X_6$    | -0.1585 | -0.2003 | -0.0050 | -0.0779 | -0.2062 |
| $X_7$    | -0.0241 | -0.7045 | -0.2246 | 0.0280  | 0.0450  |
| $X_8$    | 0.3478  | -0.1335 | 0.5078  | -0.6525 | 0.3294  |
| $X_9$    | -0.5766 | 0.2570  | -0.1990 | 0.3248  | -0.1637 |
| $X_{10}$ | -0.0449 | 0.1591  | -0.0820 | 0.2510  | -0.1134 |
| $X_{11}$ | -0.0122 | 0.0328  | 0.0063  | 0.0227  | 0.1557  |
| $X_{12}$ | 0.1381  | 0.0358  | 0.1548  | -0.1365 | 0.2951  |
| $X_{13}$ | 0.0854  | -0.3300 | 0.1676  | -0.3942 | 0.1226  |
| $X_{14}$ | 0.1468  | -0.1690 | -0.0940 | 0.1100  | 0.2672  |
| $X_{15}$ | -0.4238 | -0.0403 | -0.6918 | 0.3791  | -0.5253 |

Table 18: Coefficients of directions using SIR for  $Y_1$ .

|          | Dir1    | Dir2    | Dir3    | Dir4    | Dir5    | Dir6    |
|----------|---------|---------|---------|---------|---------|---------|
| $X_1$    | -0.2204 | -0.2731 | -0.1013 | 0.1569  | -0.1063 | -0.1416 |
| $X_2$    | -0.2516 | 0.3307  | 0.0180  | 0.0317  | 0.0848  | 0.0342  |
| $X_3$    | -0.2335 | -0.0153 | -0.0152 | 0.0681  | 0.0184  | 0.0329  |
| $X_4$    | -0.2898 | 0.0513  | 0.3301  | -0.0985 | -0.0723 | -0.1500 |
| $X_5$    | 0.3778  | 0.2154  | -0.0646 | 0.0549  | 0.1543  | 0.3391  |
| $X_6$    | -0.4415 | 0.0471  | 0.2814  | -0.1028 | -0.1108 | -0.0406 |
| $X_7$    | -0.2766 | 0.7754  | 0.3332  | 0.0188  | 0.0740  | 0.2524  |
| $X_8$    | -0.0906 | 0.0263  | -0.0904 | 0.6366  | 0.0288  | 0.1055  |
| $X_9$    | -0.5272 | -0.1434 | -0.3863 | 0.1032  | 0.6010  | -0.0869 |
| $X_{10}$ | -0.1943 | 0.0430  | -0.1205 | -0.0472 | 0.0404  | -0.0954 |
| $X_{11}$ | -0.0125 | -0.1097 | 0.0251  | -0.0308 | -0.0296 | 0.0491  |
| $X_{12}$ | -0.0187 | 0.0879  | 0.0058  | -0.0402 | -0.1337 | -0.0722 |
| $X_{13}$ | 0.0589  | -0.2055 | -0.3231 | -0.1296 | -0.5565 | 0.1784  |
| $X_{14}$ | -0.0242 | 0.2015  | 0.0220  | -0.0459 | 0.0207  | -0.3383 |
| $X_{15}$ | -0.0842 | -0.1943 | -0.6390 | -0.7117 | -0.4918 | 0.7702  |

Table 19: Coefficients of directions using SIR for  $Y_2$ .

|          | Dir1    | Dir2    | Dir3    |
|----------|---------|---------|---------|
| $X_1$    | 0.0807  | 0.0931  | 0.0374  |
| $X_2$    | -0.0615 | -0.0727 | 0.0913  |
| $X_3$    | -0.3158 | -0.0160 | -0.1243 |
| $X_4$    | 0.2033  | 0.1231  | -0.2009 |
| $X_5$    | -0.4741 | -0.2855 | 0.1517  |
| $X_6$    | 0.2626  | -0.0074 | 0.1238  |
| $X_7$    | 0.3778  | -0.0886 | 0.1529  |
| $X_8$    | 0.4416  | -0.5953 | 0.5560  |
| $X_9$    | -0.1200 | 0.2260  | 0.2358  |
| $X_{10}$ | -0.3198 | 0.0175  | 0.1309  |
| $X_{11}$ | -0.0346 | 0.0168  | -0.0675 |
| $X_{12}$ | -0.0263 | 0.0510  | -0.0105 |
| $X_{13}$ | -0.1888 | 0.0653  | 0.0046  |
| $X_{14}$ | -0.1453 | -0.1032 | 0.1437  |
| $X_{15}$ | -0.2048 | 0.6766  | -0.6823 |

Table 20: Coefficients of directions using SIR for  $Y_3$ .

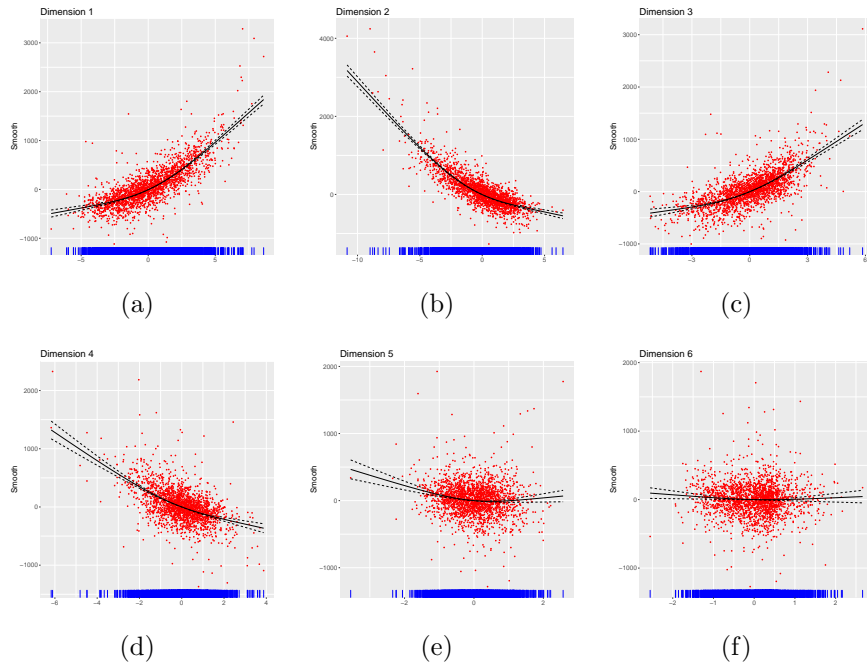

Figure 1: Partial residual plots for each of the PCA predictors when  $Y_2$  is the response.

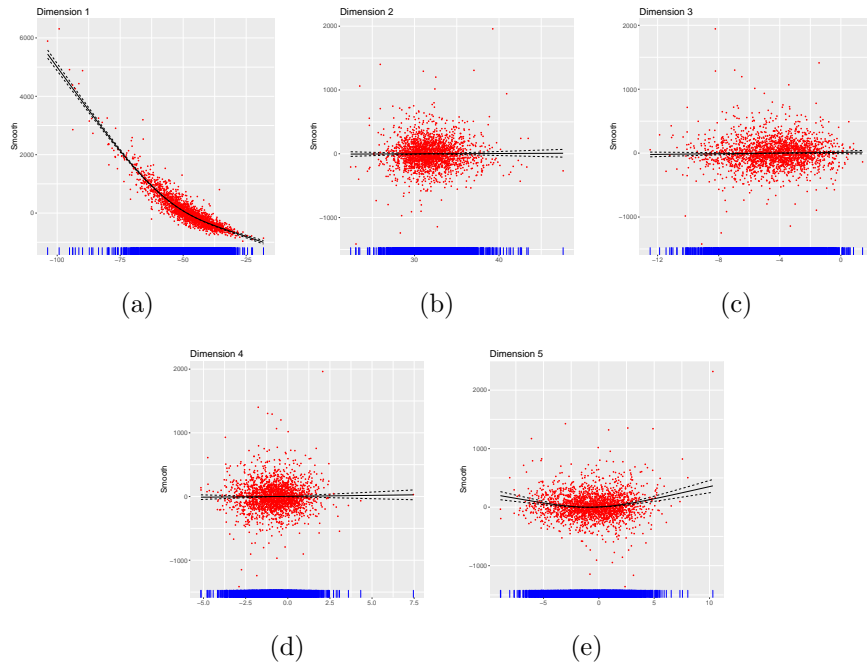

Figure 2: Partial residual plots for each of the significant SIR predictors when  $Y_2$  is the response.

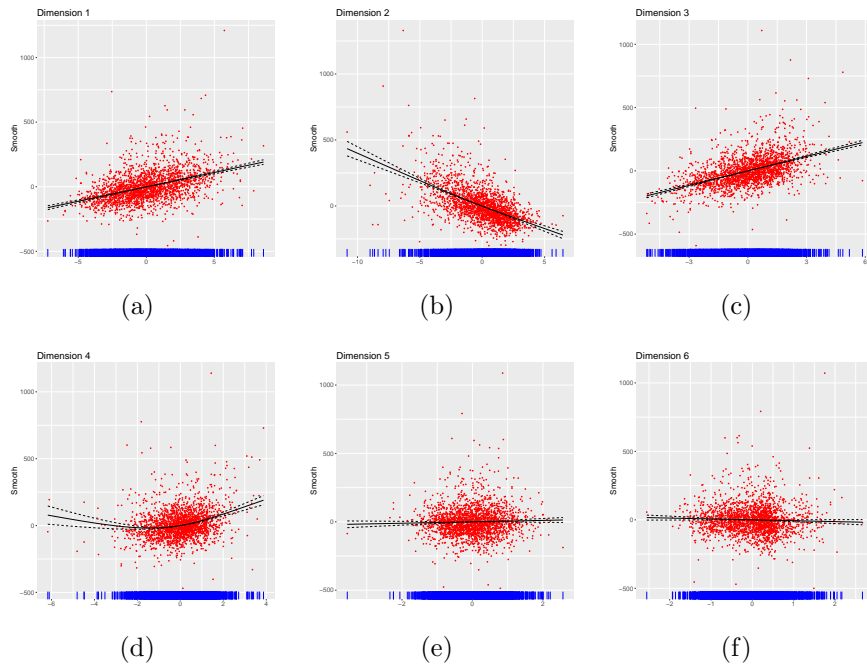

Figure 3: Partial residual plots for each of the PCA predictors when  $Y_3$  is the response.

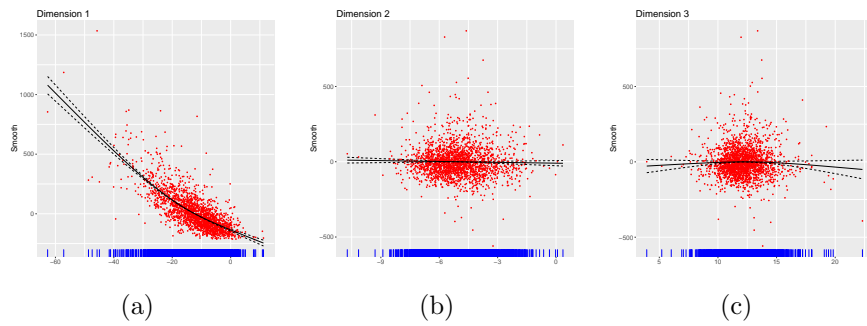

Figure 4: Partial residual plots for each of the significant SIR predictors when  $Y_3$  is the response.
